# Supplementary material
Source: publisher figshare collection journal article supplement (https://frontiersin.figshare.com/ndownloader/files/34294370)
Supplement: Supplementary file 1 [file 34294370]

## Sheet: Sheet1
Well	Member	Depth/m	Mineral type	Mineral texture	Inclusion type	Size/μm	Homogenization	Freezing
							temperature/℃	temperature/℃
Fengcheng1	P1f1	3970.5	calcite	growth zone	A	13	65	-4
Fengcheng1	P1f1	4208.26	searlesite	growth zone	A	4	110	-6.2
Fengcheng1	P1f2	3805.52	searlesite	growth zone	A	12	114	-19.2
Fengcheng1	P1f2	3743.6	searlesite	long healed crack	A	7	110	-16.8
Fengcheng1	P1f3	4228.35	calcite	long healed crack	A	6	170	-3.6
Fengcheng1	P1f3	4228.35	searlesite	growth zone	A	6	100	-14.9
Fengnan1	P1f3	4196	searlesite	growth zone	A	7	70	/
Fengnan1	P1f3	4196	searlesite	growth zone	A	3	75	/
Fengnan1	P1f3	4196.23	searlesite	growth zone	A	4	60	/
Fengnan1	P1f3	4196.23	searlesite	long healed crack	A	10	98	-11
Fengnan1	P1f3	4196.23	searlesite	growth zone	A	5	108	-11.5
Fengnan1	P1f3	4196.35	searlesite	growth zone	A	6	60	/
Fengnan1	P1f3	4196.35	searlesite	growth zone	A	6	98	-9.8
Fengnan1	P1f3	4196.48	searlesite	growth zone	A	5	108	-10.2
Fengnan1	P1f3	4196.48	searlesite	long healed crack	A	5	108	-9.9
Fengnan1	P1f3	4196.89	searlesite	growth zone	A	5	70	/
Fengnan1	P1f3	4196.89	searlesite	growth zone	A	5	98	-9.7
Fengnan1	P1f3	4197.25	searlesite	long healed crack	A	6	98	-9.8
Fengnan1	P1f3	4197.25	searlesite	growth zone	A	5	90	-10.1
Fengnan1	P1f3	4197.25	searlesite	long healed crack	A	5	102	-10.3
Fengnan1	P1f2	4236.4	searlesite	growth zone	A	6	40	/
Fengnan1	P1f2	4236.4	searlesite	long healed crack	A	6	40	/
Fengnan1	P1f2	4235.98	searlesite	long healed crack	A	5	48	/
Fengnan1	P1f2	4235.98	searlesite	growth zone	A	4	38	/
Fengnan1	P1f2	4236.28	searlesite	growth zone	A	5	36	/
Fengnan1	P1f2	4236.28	searlesite	growth zone	A	4	98	-13.2
Fengnan1	P1f2	4236.74	searlesite	growth zone	A	5	98	-11.8
Fengnan1	P1f2	4236.74	searlesite	growth zone	A	3	98	-11.7
Fengnan1	P1f2	4236.74	searlesite	growth zone	A	5	101	-11.6
Fengnan1	P1f2	4236.85	searlesite	growth zone	A	3	62	/
Fengnan1	P1f2	4236.85	searlesite	growth zone	A	4	105	-13.1
Fengnan1	P1f2	4237.01	searlesite	growth zone	A	5	104	-13.2
Fengnan1	P1f2	4237.01	searlesite	long healed crack	A	5	94	-14.9
Fengnan1	P1f2	4237.16	searlesite	growth zone	A	6	95	-14.3
Fengnan1	P1f2	4237.16	searlesite	growth zone	A	6	95	-14
Fengnan1	P1f2	4237.51	searlesite	long healed crack	B	9	40	/
Fengnan1	P1f2	4237.51	searlesite	long healed crack	B	4	45	/
Fengnan1	P1f2	4237.19	searlesite	long healed crack	B	6	40	/
Fengnan1	P1f2	4237.19	searlesite	long healed crack	B	6	40	/
Fengnan1	P1f2	4237.19	searlesite	growth zone	A	10	40	/
Fengnan1	P1f3	4197.6	searlesite	growth zone	A	4	60	/
Fengnan1	P1f3	4197.6	searlesite	growth zone	A	4	53	/
Fengnan1	P1f3	4197.72	searlesite	growth zone	A	5	53	/
Fengnan1	P1f3	4197.72	searlesite	long healed crack	A	6	93	-9
Fengnan1	P1f3	4197.95	searlesite	long healed crack	A	4	93	-8.8
Fengnan1	P1f3	4197.95	searlesite	growth zone	A	5	93	-8.9
Fengnan1	P1f3	4198.25	searlesite	growth zone	A	20	103	-8.7
Fengnan1	P1f3	4198.25	searlesite	long healed crack	A	6	103	-9.3
Fengnan2	P1f3	4100.58	searlesite	long healed crack	A	20	112	/
Fengnan2	P1f3	4100.58	searlesite	growth zone	A	10	100	/
Fengnan2	P1f3	4101.29	searlesite	growth zone	A	15	111	/
Fengnan2	P1f3	4101.29	searlesite	growth zone	A	5	112	/
Fengnan2	P1f3	4105.84	searlesite	long healed crack	A	4	100	/
Fengnan2	P1f3	4105.84	searlesite	growth zone	A	4	111	/
Fengnan2	P1f3	4105.84	searlesite	growth zone	A	5	112	/
Fengnan2	P1f3	4107.26	searlesite	growth zone	A	4	100	/
Fengnan2	P1f3	4107.26	searlesite	long healed crack	A	4	111	/
Fengnan2	P1f3	4102.14	searlesite	long healed crack	A	6	104	/
Fengnan2	P1f3	4102.14	searlesite	long healed crack	A	5	103	/
Fengnan2	P1f3	4101.12	searlesite	growth zone	A	7	109	/
Fengnan2	P1f3	4101.12	searlesite	long healed crack	A	5	110	/
Fengnan2	P1f3	4100.39	searlesite	long healed crack	A	7	116	/
Fengnan2	P1f3	4100.39	searlesite	growth zone	A	6	112	/
Fengnan2	P1f3	4100.58	searlesite	growth zone	A	5	107	-10
Fengnan2	P1f3	4100.58	searlesite	growth zone	A	8	109	-8.5
Fengnan2	P1f3	4100.86	searlesite	growth zone	A	5	107	-12
Fengnan2	P1f3	4100.86	searlesite	long healed crack	A	3	95	-12.5
Fengnan2	P1f3	4100.86	searlesite	long healed crack	A	7	110	-9.8
Fengnan2	P1f2	4226.62	searlesite	growth zone	A	7	106	-19.2
Fengnan2	P1f2	4226.62	searlesite	long healed crack	B	6	52	/
Fengnan2	P1f2	4226.62	calcite	long healed crack	A	6	168	-4.8
Fengnan5	P1f2	4130.2	searlesite	growth zone	A	8	106	-19.1
Fengnan5	P1f2	4130.2	searlesite	growth zone	A	12	100	-16.6
Fengnan5	P1f2	4130.2	searlesite	growth zone	A	10	100	-16.8
